# Supplementary material for: Efficient catalyst removal and recycling in copolymerization of epoxides with carbon dioxide via simple liquid–liquid phase separation
Source: Royal Society of Chemistry journal article supplement (doi:10.1039/c3cc45622f), 2013-01-01

## Efficient catalyst removal and recycling in copolymerization of epoxides with carbon dioxide via simple liquid–liquid phase separation

Koji Nakano,<sup>a</sup> Ryuhei Fujie,<sup>b</sup> Ryo Shintani,<sup>b</sup> and Kyoko Nozaki\*<sup>b</sup>

<sup>a</sup> Department of Organic and Polymer Materials Chemistry, Tokyo University of Agriculture and Technology, 2-24-16 Naka-cho, Koganei, Tokyo 184-8588, Japan

<sup>b</sup> Department of Chemistry and Biotechnology, Graduate School of Engineering, The University of Tokyo, 7-3-1 Hongo, Bunkyo-ku, Tokyo 113-8656, Japan

### Supplementary Information

#### I. General

NMR spectra were recorded on JEOL JNM-ECP500 or JEOL JNM-ECS400 spectrometers. Size-exclusion chromatography analyses were performed with Shodex KF-804L columns using THF as an eluent and the molecular weights were calibrated against standard polystyrene samples. UV-VIS spectra were recorded on SHIMADZU UV-3150 spectrometer. ICP analyses were carried out using Thermo Fisher SCIENTIFIC iCAP 6300 ICP spectrometer.

Propylene oxide (Kanto Chemical) was distilled over CaH<sub>2</sub> under argon prior to use. Complex **1** was synthesized following the literature procedure.<sup>1</sup> Bis(triphenylphosphine)-iminium chloride (Aldrich) was recrystallized from CH<sub>2</sub>Cl<sub>2</sub>/Et<sub>2</sub>O prior to use.

#### II. Copolymerization Reactions

##### General Procedure for Table 1 and Table 2, Cycle 1.

Propylene oxide (4.0 mL, 57 mmol) was added to a 50 mL stainless steel autoclave containing complex **1** (9.4 mg, 14 μmol) and bis(triphenylphosphine)iminium chloride (4.2 mg, 7.2 μmol) under argon. This was pressurized with CO<sub>2</sub> (2.0 MPa) and the mixture was stirred for 13 h at 22 °C. After removal of the remaining CO<sub>2</sub>, the reaction mixture was transferred to a vial with CH<sub>2</sub>Cl<sub>2</sub> and concentrated under vacuum. The residue was dissolved in CH<sub>2</sub>Cl<sub>2</sub> (6.0 mL) and carboxylic acid (28 μmol) was added to it. The mixture was stirred for 2 h at room temperature and the solvent was removed under vacuum. This was dissolved in MeCN (10 mL) and extracted with hexane (20 mL x 3). The hexane phase was concentrated and the amount of cobalt complex was estimated by UV-VIS spectroscopy in CH<sub>2</sub>Cl<sub>2</sub>. The MeCN phase was concentrated to afford poly(propylene carbonate), which was analyzed by <sup>1</sup>H NMR in CDCl<sub>3</sub> and by size-exclusion chromatography in THF.

##### General Procedure for Table 2, Cycles 2–6.

The recovered cobalt complex from the hexane phase was dried under vacuum (0.06 Torr) for 1 h at room temperature in an 80 mL glass Schlenk tube. This was then dissolved in 1000 equiv of propylene oxide (0.96–0.78 mL) and transferred into a 50 mL stainless steel autoclave containing bis(triphenylphosphine)iminium chloride (0.5 equiv to cobalt) under argon. The Schlenk tube was washed with propylene oxide (1000 equiv x 3) and this was also

<sup>1</sup> M. Tokunaga, J. F. Larrow, F. Kakiuchi and E. N. Jacobsen, *Science* 1997, **277**, 936.

transferred into the autoclave. The autoclave was pressurized with CO<sub>2</sub> (2.0 MPa) and the mixture was stirred for 13 h at 22 °C. After removal of the remaining CO<sub>2</sub>, the reaction mixture was transferred to a vial with CH<sub>2</sub>Cl<sub>2</sub> and concentrated under vacuum. The residue was dissolved in CH<sub>2</sub>Cl<sub>2</sub> (6.0 mL) and myristic acid (2.0 equiv to cobalt) was added to it. The mixture was stirred for 2 h at room temperature and the solvent was removed under vacuum. This was dissolved in MeCN (10 mL) and extracted with hexane (20 mL x 3). The hexane phase was concentrated and the amount of cobalt complex was estimated by UV-VIS spectroscopy in CH<sub>2</sub>Cl<sub>2</sub>. The MeCN phase was concentrated to afford poly(propylene carbonate), which was analyzed by <sup>1</sup>H NMR in CDCl<sub>3</sub> and by size-exclusion chromatography in THF.

### III. Representative UV-VIS and <sup>1</sup>H NMR Spectra

#### UV-VIS Spectra for Complex 1.

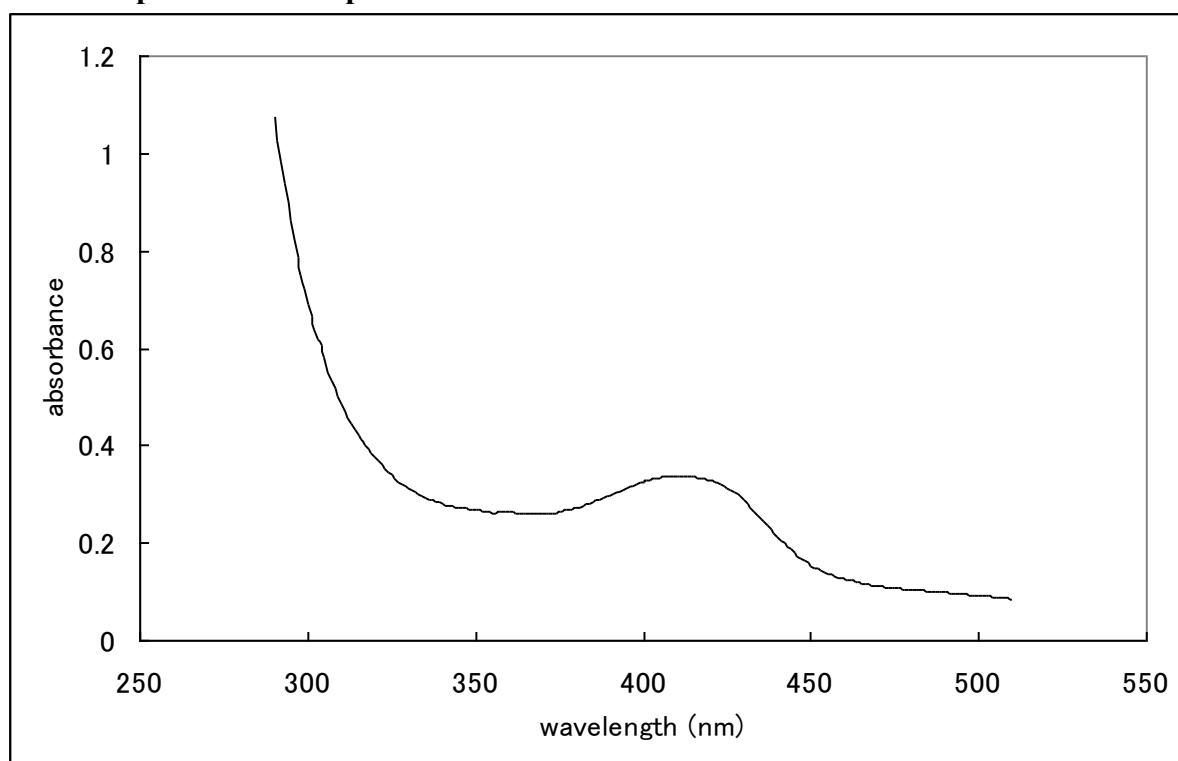

Complex **1** (16.8 mg, 25.3  $\mu\text{mol}$ ) was dissolved in CH<sub>2</sub>Cl<sub>2</sub> to make a 500 mL solution ( $c = 5.07 \times 10^{-5}$  M). The absorbance  $A$  at  $\lambda_{\text{max}}$  (411 nm) was determined to be 0.338 using a cell having optical path length  $l = 1.00$  cm. Based on  $A = \epsilon \cdot c \cdot l$ ,  $\epsilon$  was calculated to be  $6.67 \times 10^3$  M<sup>-1</sup>·cm<sup>-1</sup>.

### UV-VIS Spectra for Table 1, entry 4.

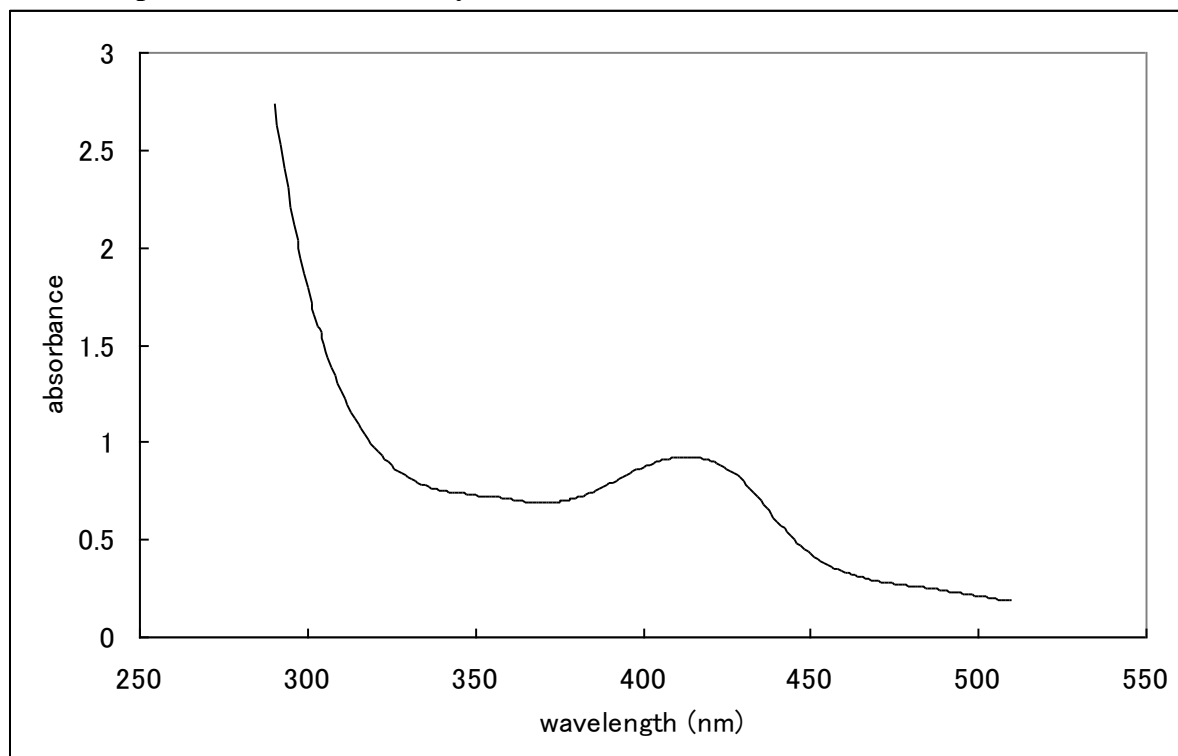

The residue of the hexane phase was dissolved in  $\text{CH}_2\text{Cl}_2$  to make a 100 mL solution. The absorbance  $A$  at  $\lambda_{\text{max}}$  (411 nm) was determined to be 0.927 using a cell having optical path length  $l = 1.00$  cm. Based on  $A = \epsilon \cdot c \cdot l$  and assuming  $\epsilon = 6.67 \times 10^3 \text{ M}^{-1}\text{cm}^{-1}$ ,  $c$  was calculated to be  $1.39 \times 10^{-4}$  M. This led to the estimated amount of removed cobalt being  $13.9 \mu\text{mol}$ , which corresponded to 96% of the used complex **1** (9.6 mg,  $14.5 \mu\text{mol}$ ).

### $^1\text{H}$ NMR for Poly(propylene carbonate) in $\text{CDCl}_3$ .

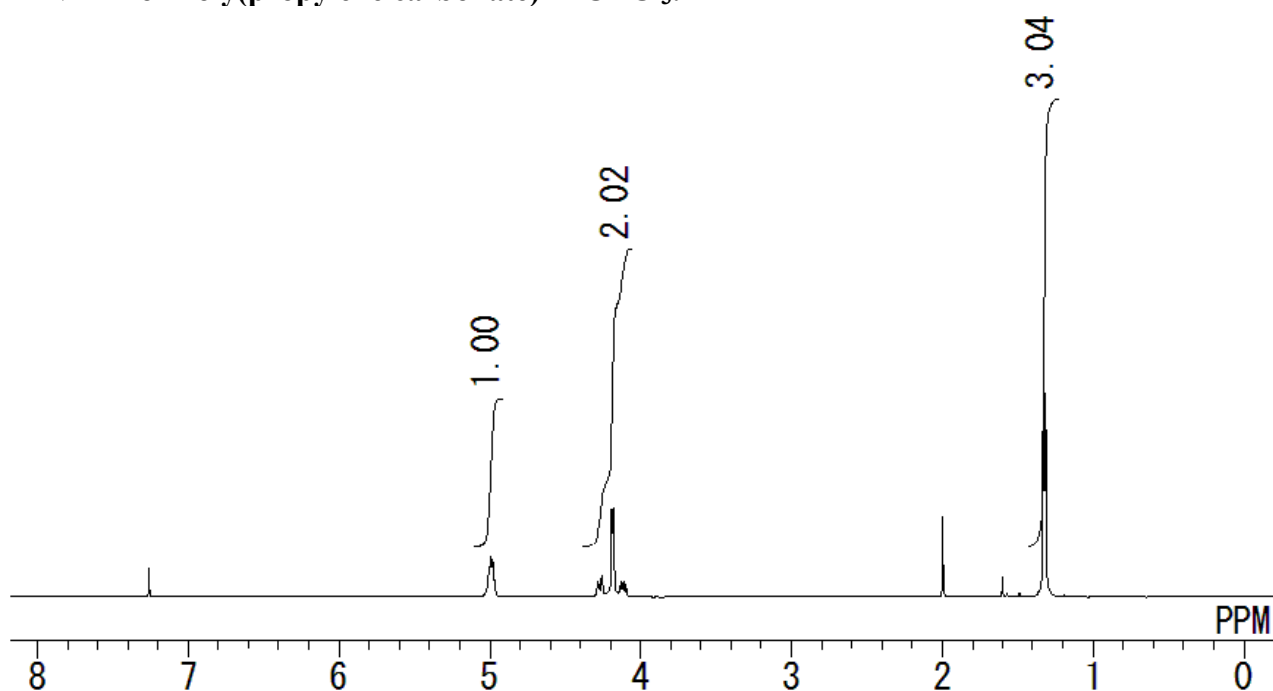

Supplement: c3cc45622f.pdf [file c3cc45622f.pdf]
